# Supplementary material for: Modeling and development of a decision support system for supplier selection in the process industry
Source: Springer Nature journal article supplement (doi:10.1186/2251-712x-9-23), 2013-09-06
Supplement: 40092_2012_53_MOESM1_ESM.pdf [file 40092_2012_53_MOESM1_ESM.pdf]

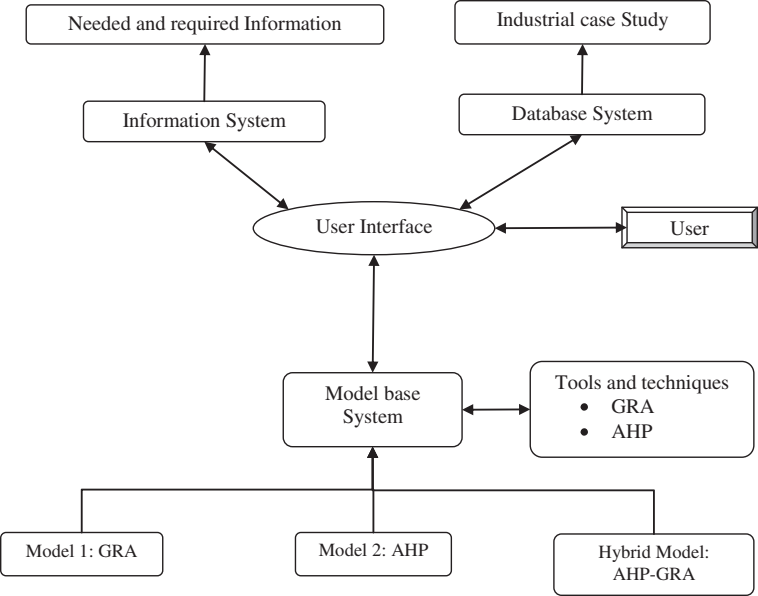

Needed and required Information

Industrial case Study

Information System

Database System

User Interface

User

Model base System

Tools and techniques

- GRA
- AHP

Model 1: GRA

Model 2: AHP

Hybrid Model:  
AHP-GRA
