# Supplementary material for: Modeling and development of a decision support system for supplier selection in the process industry
Source: Springer Nature journal article supplement (doi:10.1186/2251-712x-9-23), 2013-09-06

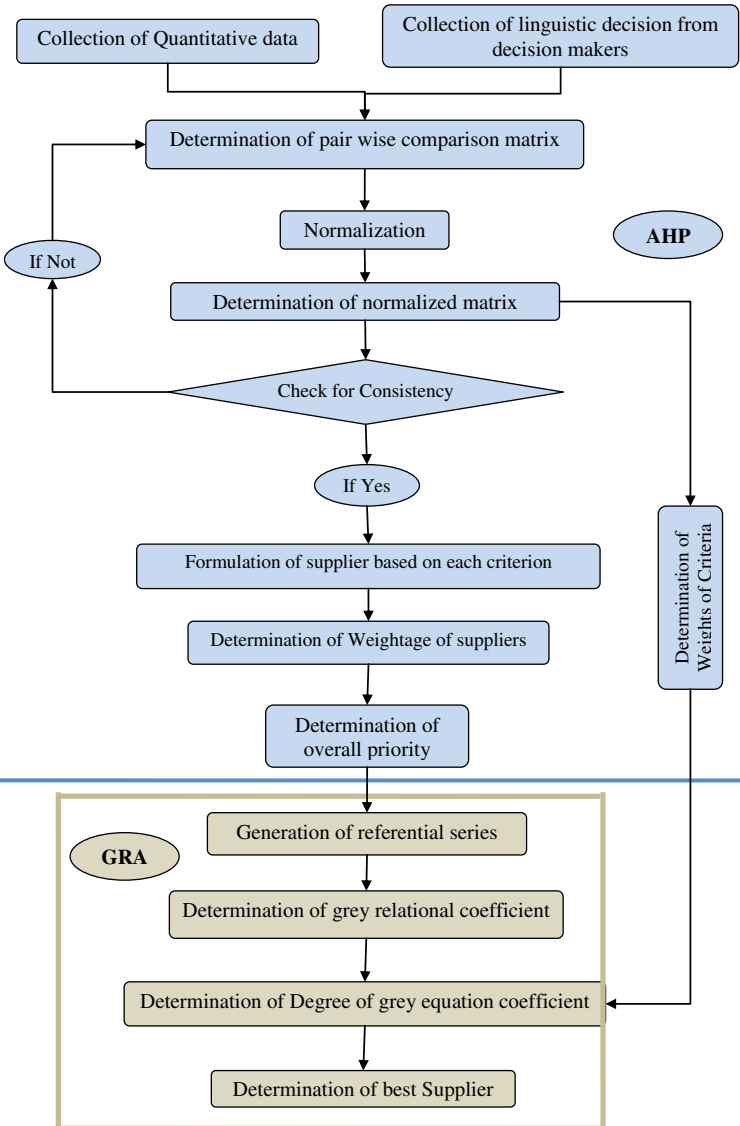

Supplement: 40092_2012_53_MOESM6_ESM.pdf [file 40092_2012_53_MOESM6_ESM.pdf]
